# Supplementary material for: Isoform Sequencing Based Transcriptome Resource for Flathead Grey Mullet (Mugil cephalus)
Source: Frontiers journal article supplement (doi:10.3389/fmars.2022.930017), 2022-06-20
Supplement: Data_Sheet_1.PDF [file Data_Sheet_1.PDF]

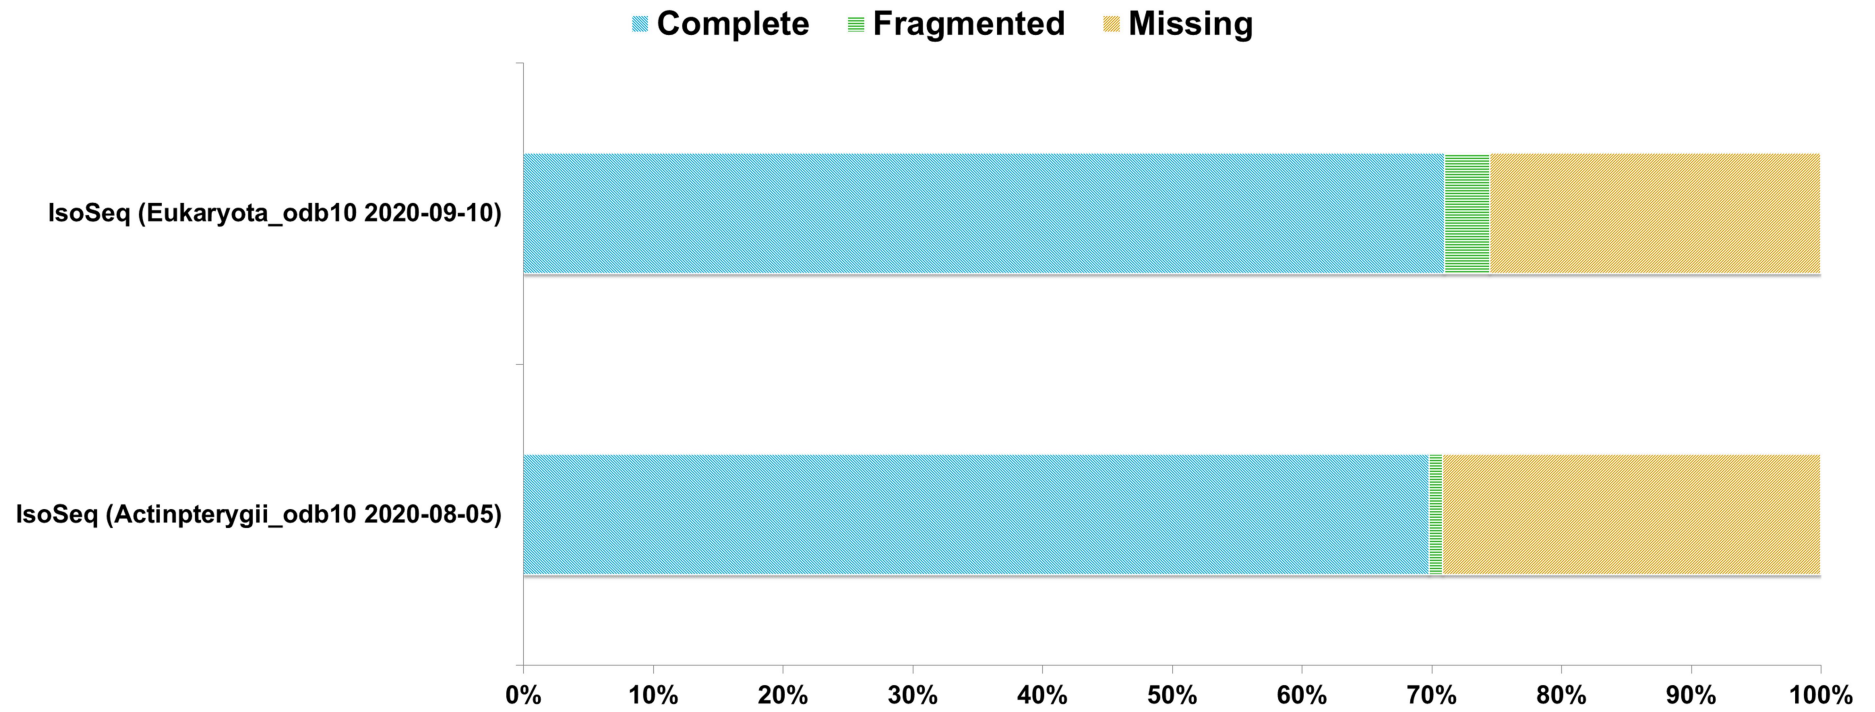

**Supplementary Figure 1.** The BUSCO scores illustrating the completeness for *M. cephalus* transcriptome.

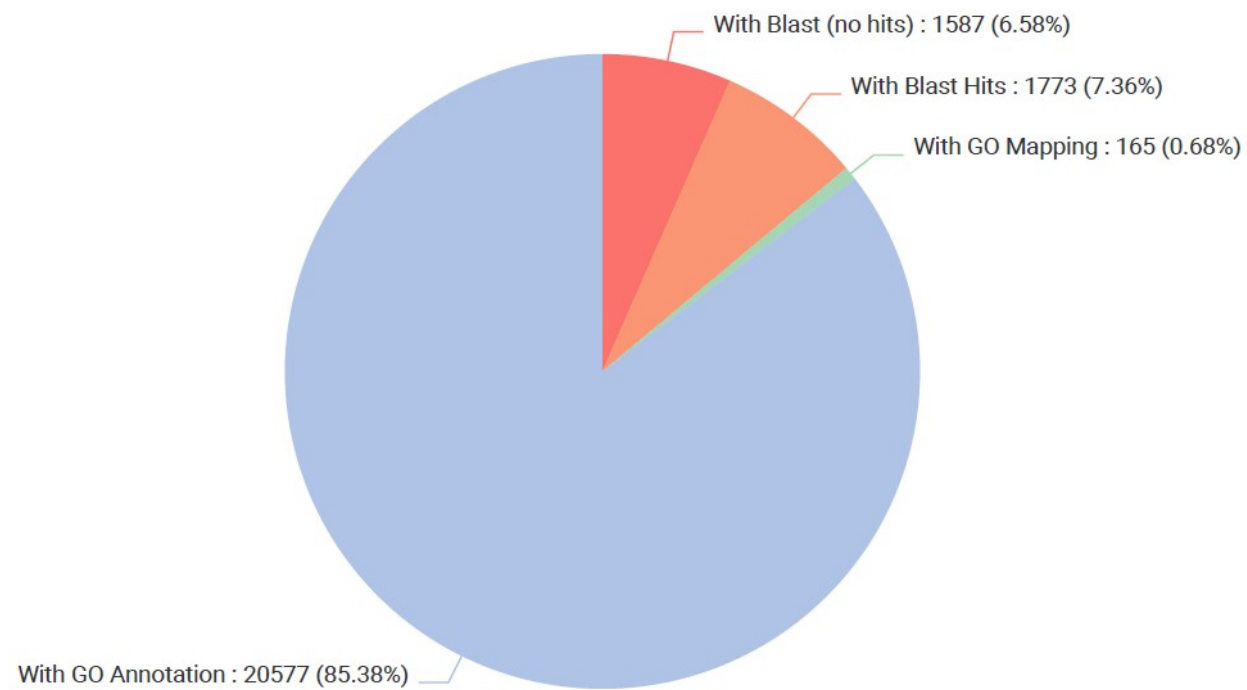

**Supplementary Figure 2.** Annotation summary of unique genes in *Mugil cephalus* transcriptome.

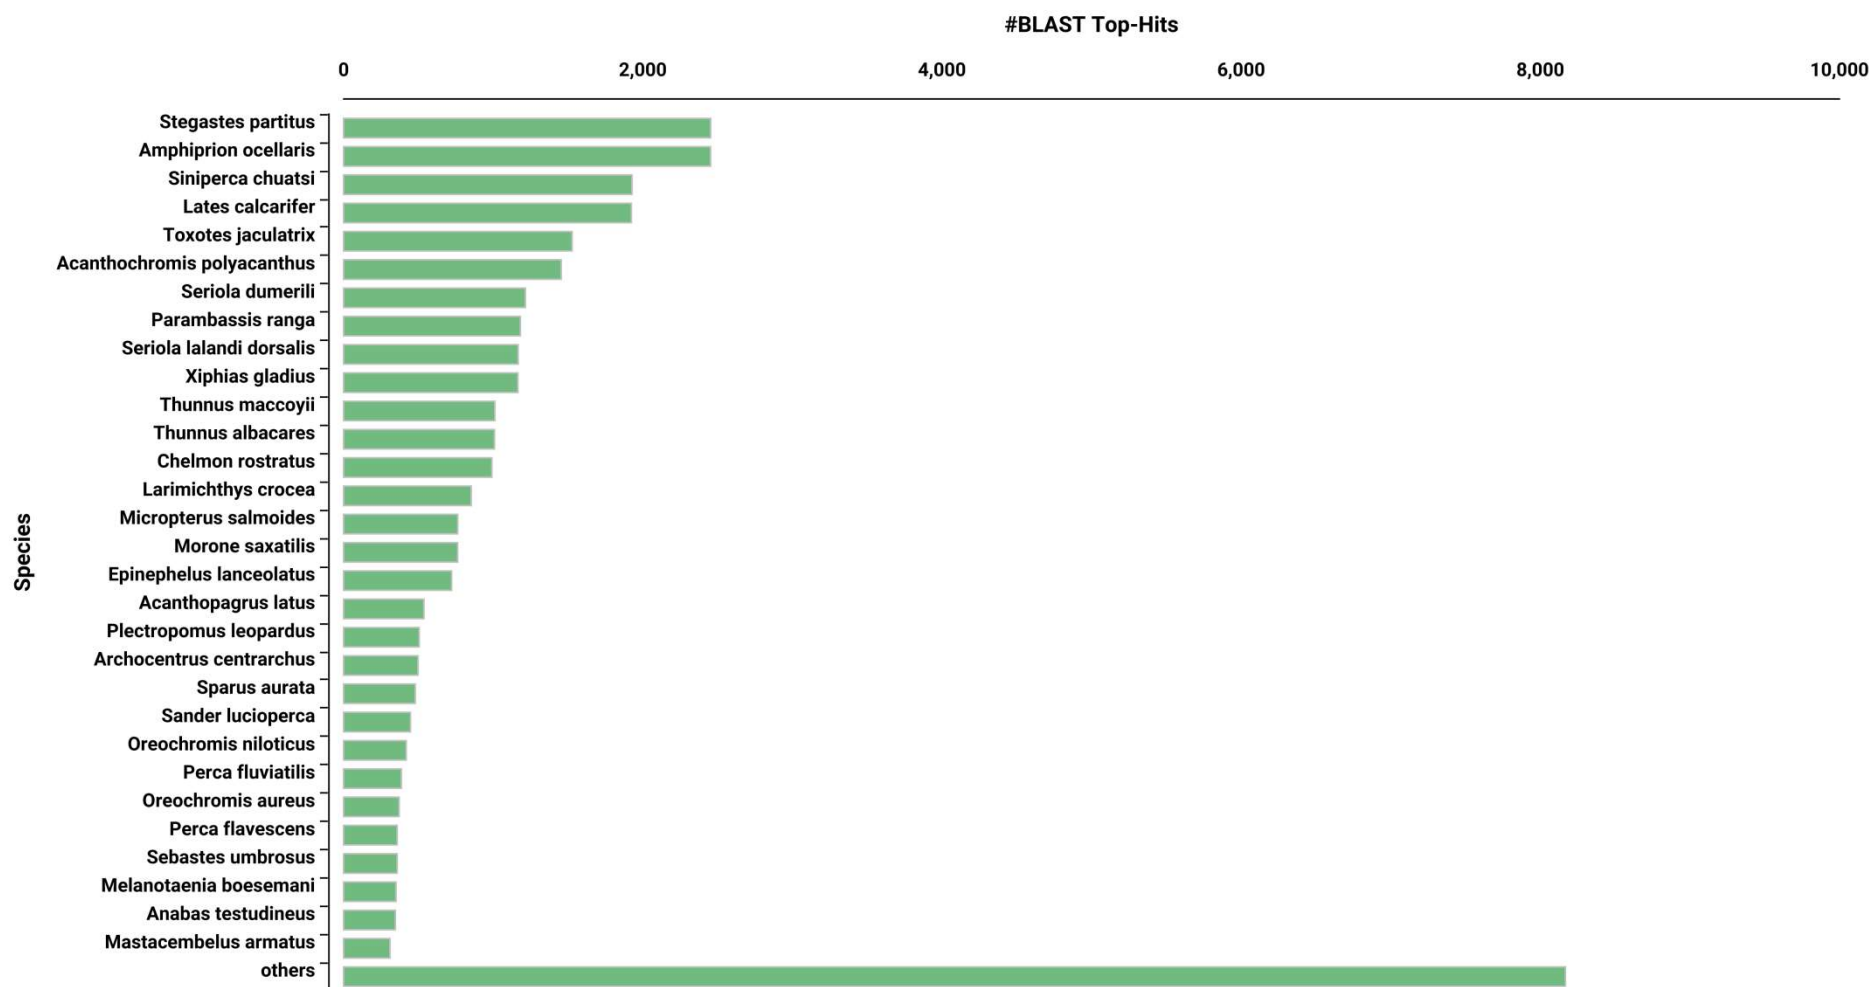

**Supplementary Figure 3.** The top-hit species distribution for the blastx search performed on unique genes in *Mugil cephalus* transcriptome.

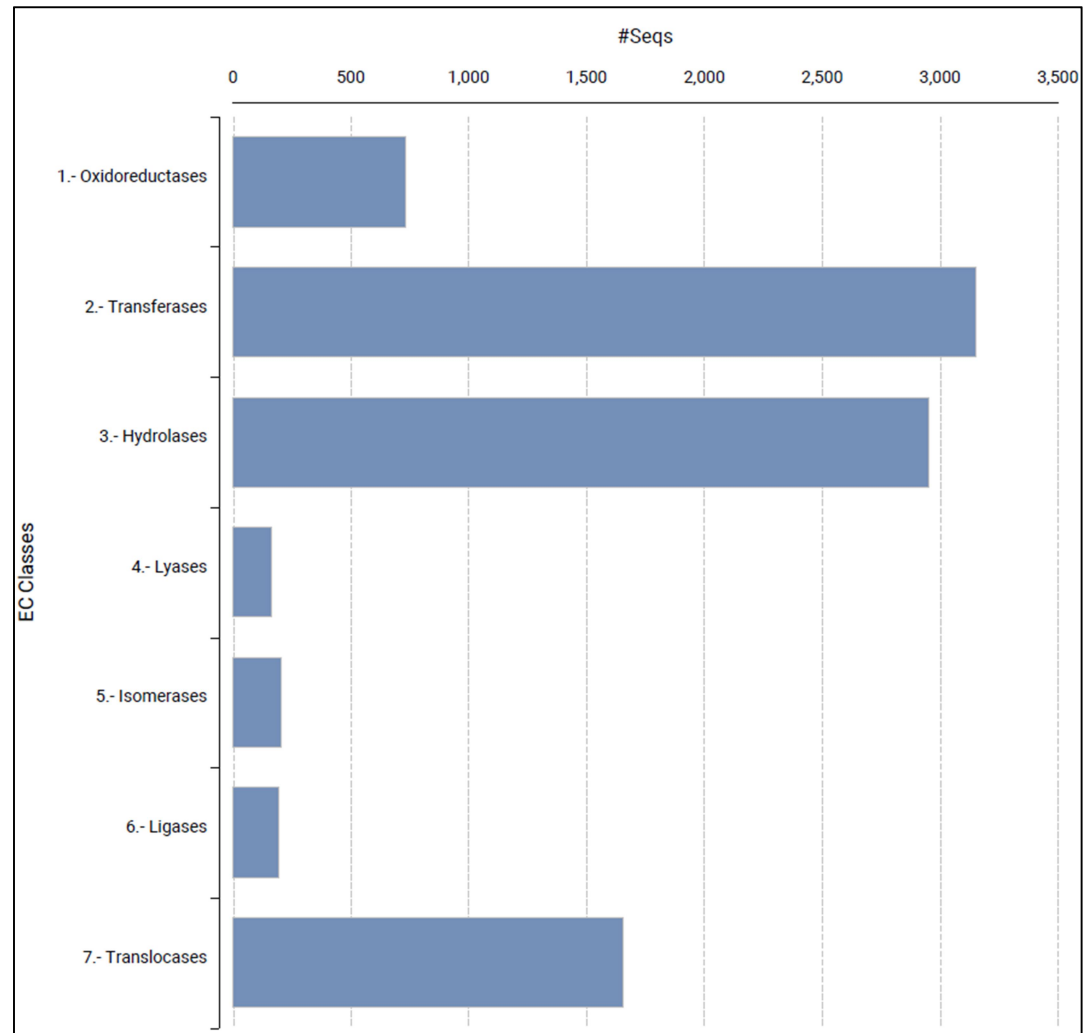

**Supplementary Figure 4.** Enzyme code distribution for unique genes in *Mugil cephalus* transcriptome.

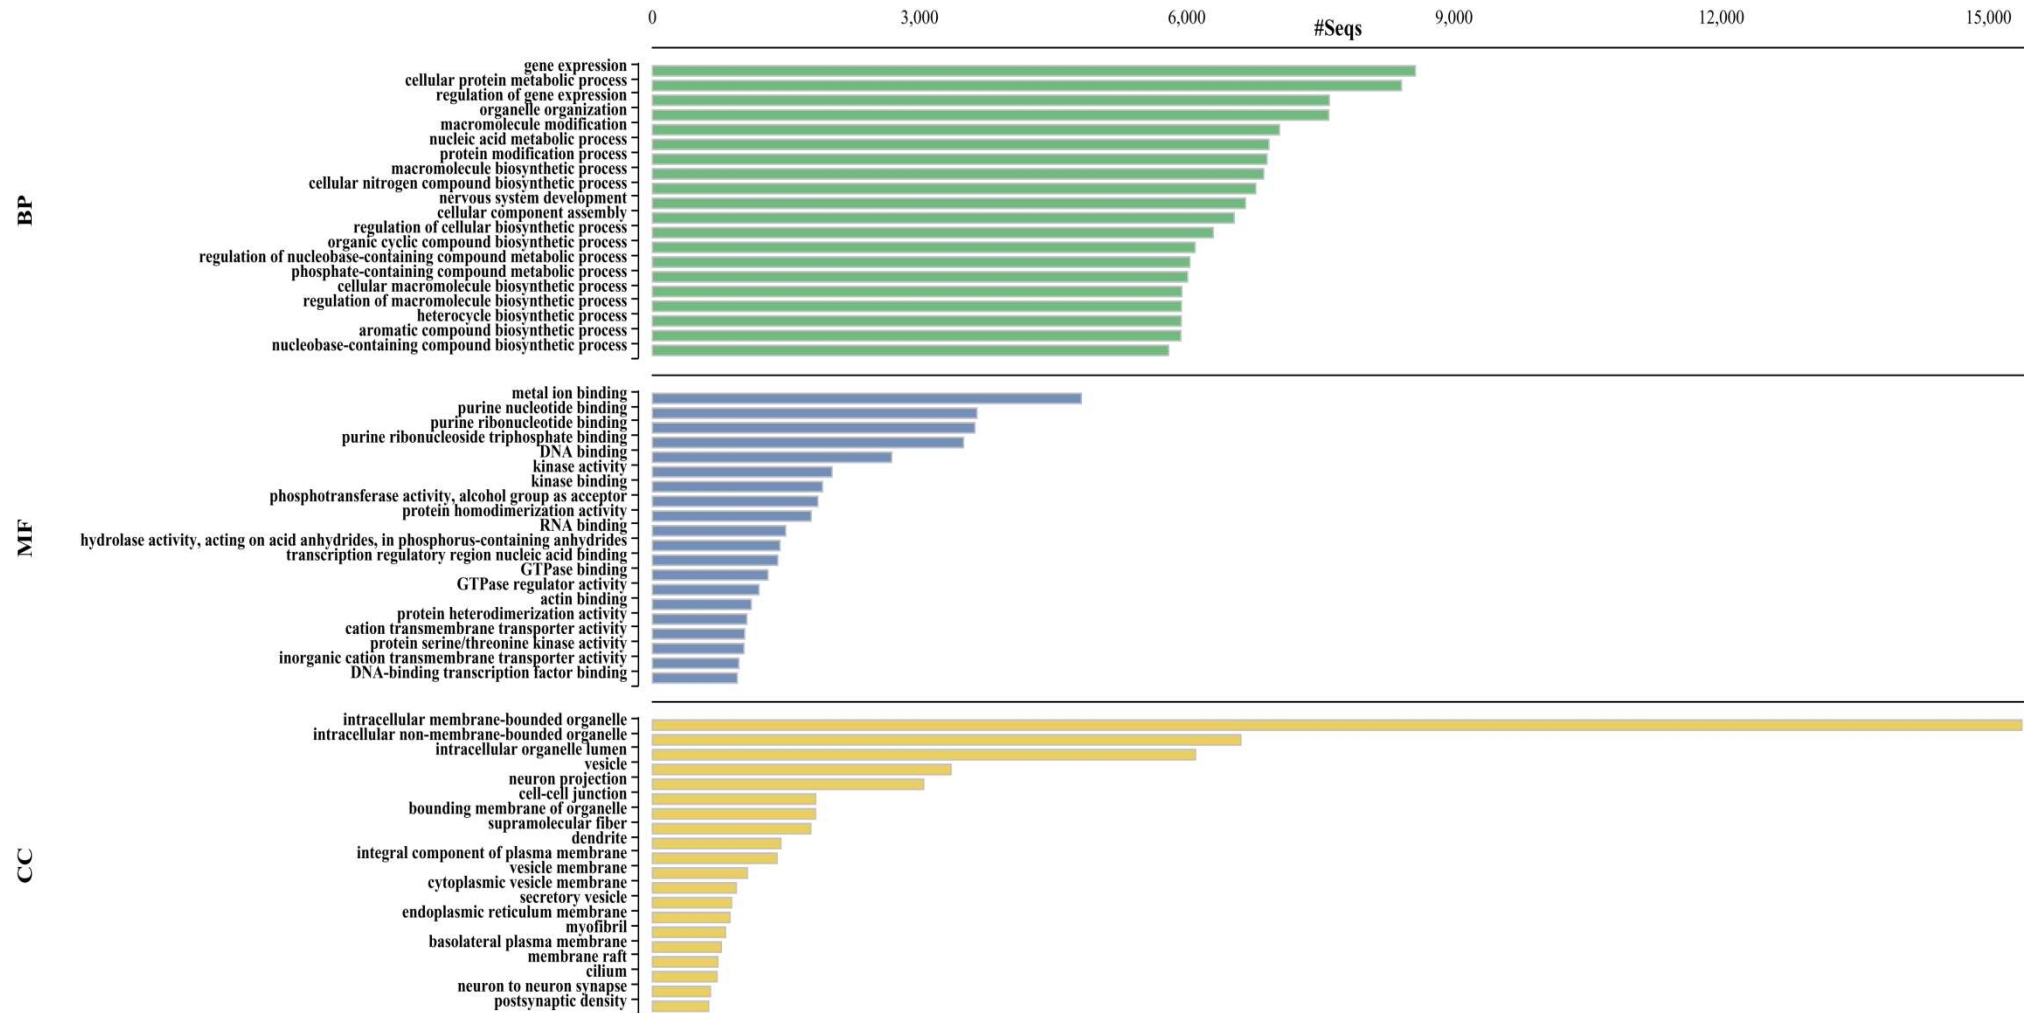

**Supplementary Figure 5.** Gene ontology distribution (by level 5) for the unique genes in *Mugil cephalus* transcriptome.

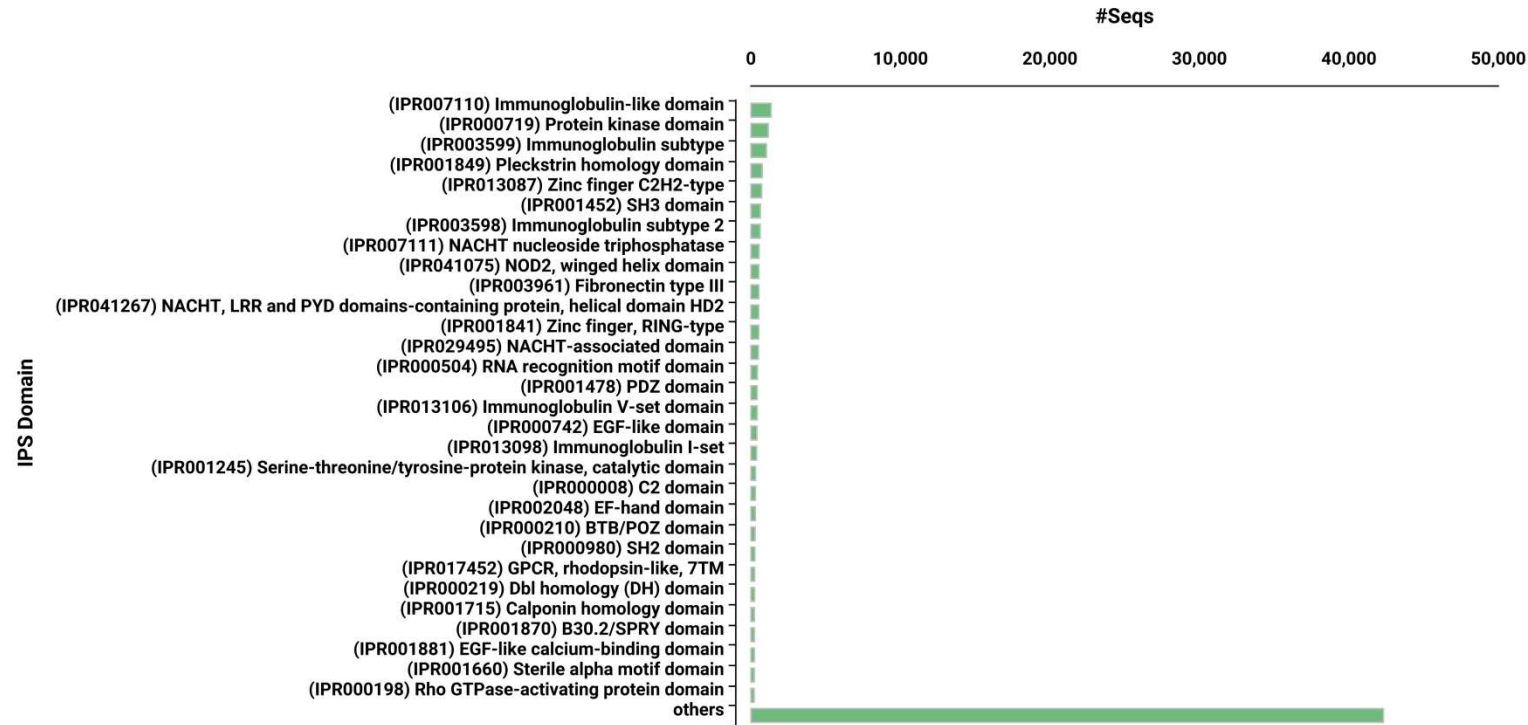

**Supplementary Figure 6.** The major protein domains in the transcriptome of *M. cephalus* as obtained through InterProScan search.

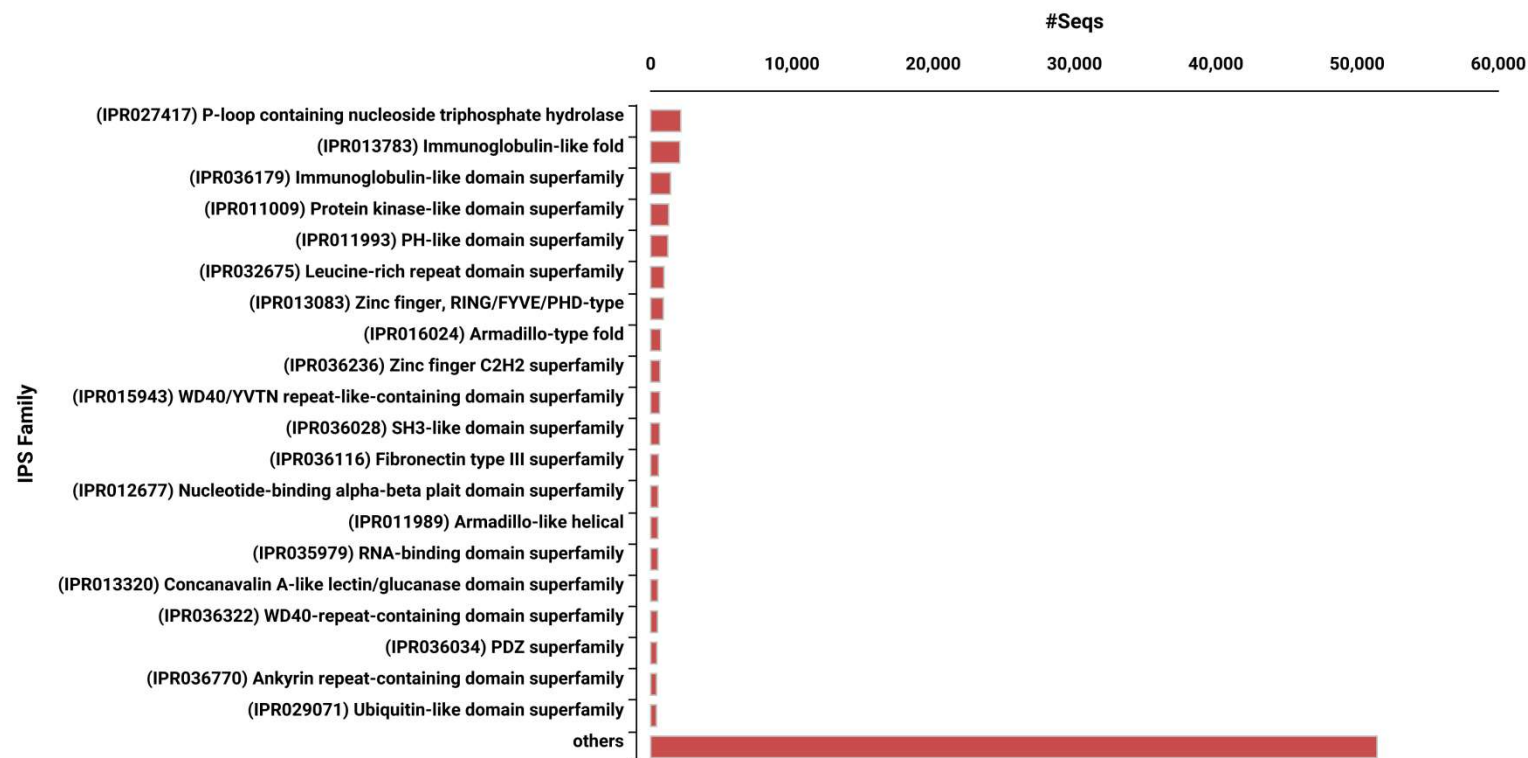

**Supplementary Figure 7.** The major protein families in the transcriptome of *M. cephalus* as obtained through InterProScan search.

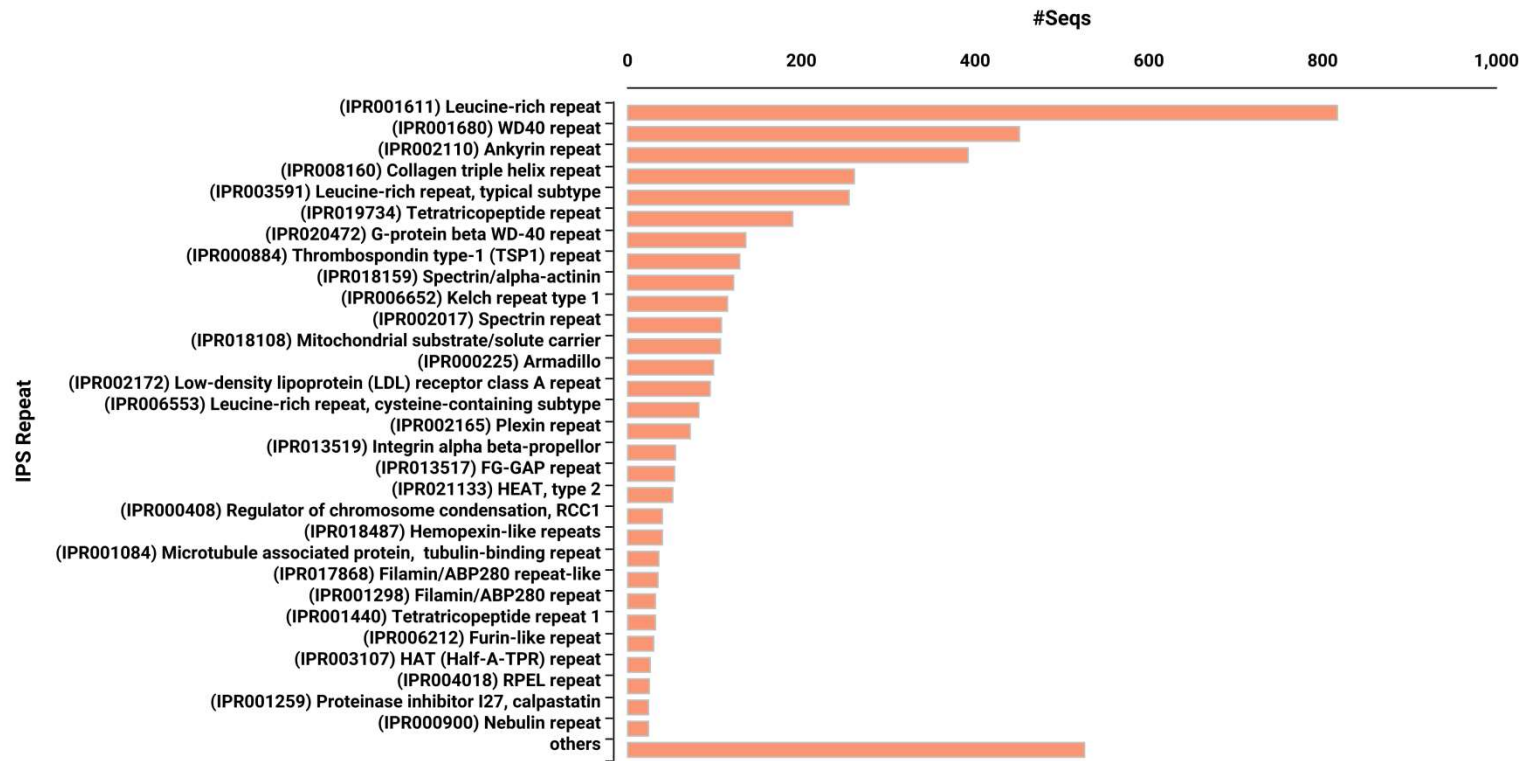

**Supplementary Figure 8.** The major InterProScan repeats in the transcriptome of *M. cephalus* as obtained through InterProScan search.



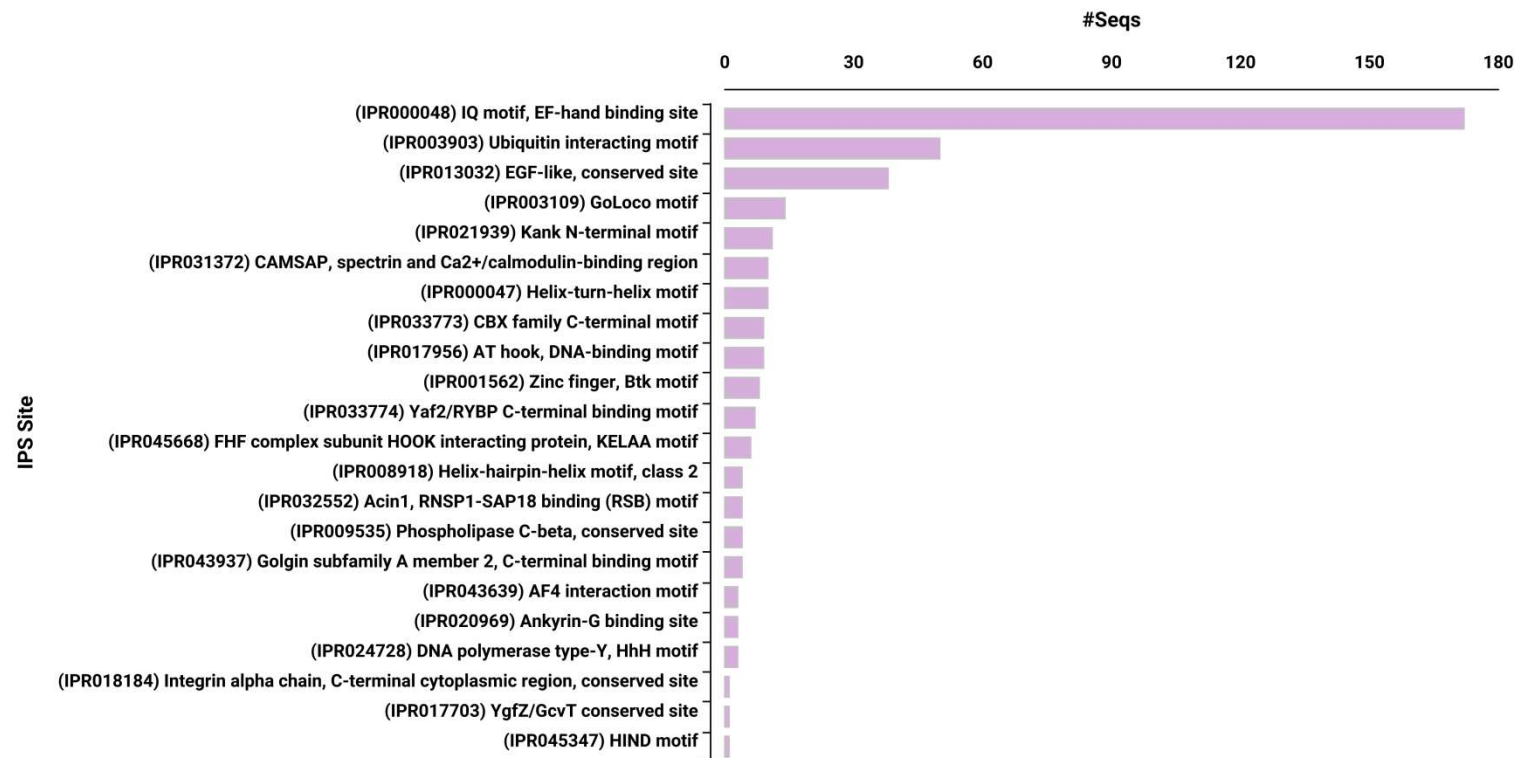

**Supplementary Figure 9.** The major InterProScan sites in the transcriptome of *M. cephalus* as obtained through InterProScan search.

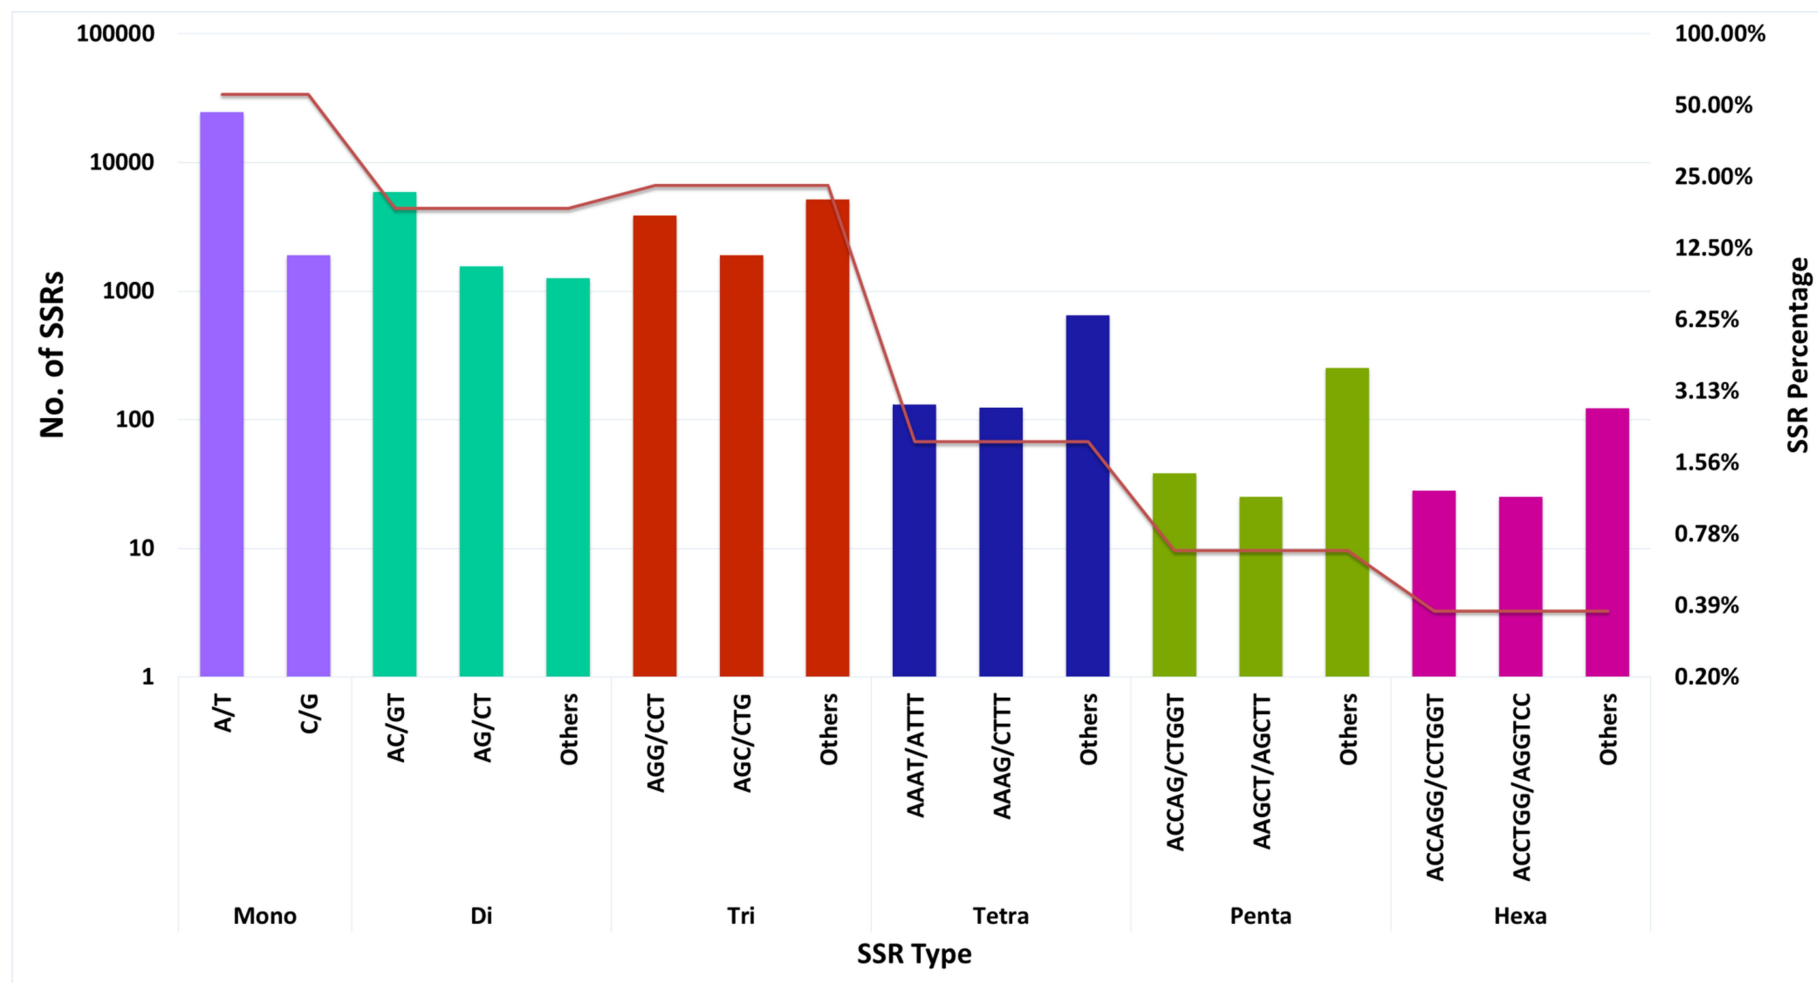

**Supplementary Figure 10. SSR Profile for unique genes in *Mugil cephalus* transcriptome.** The bar plot indicates the number of SSRs in each SSR type and the red line indicates the percentage contributed by each type to the total SSRs.

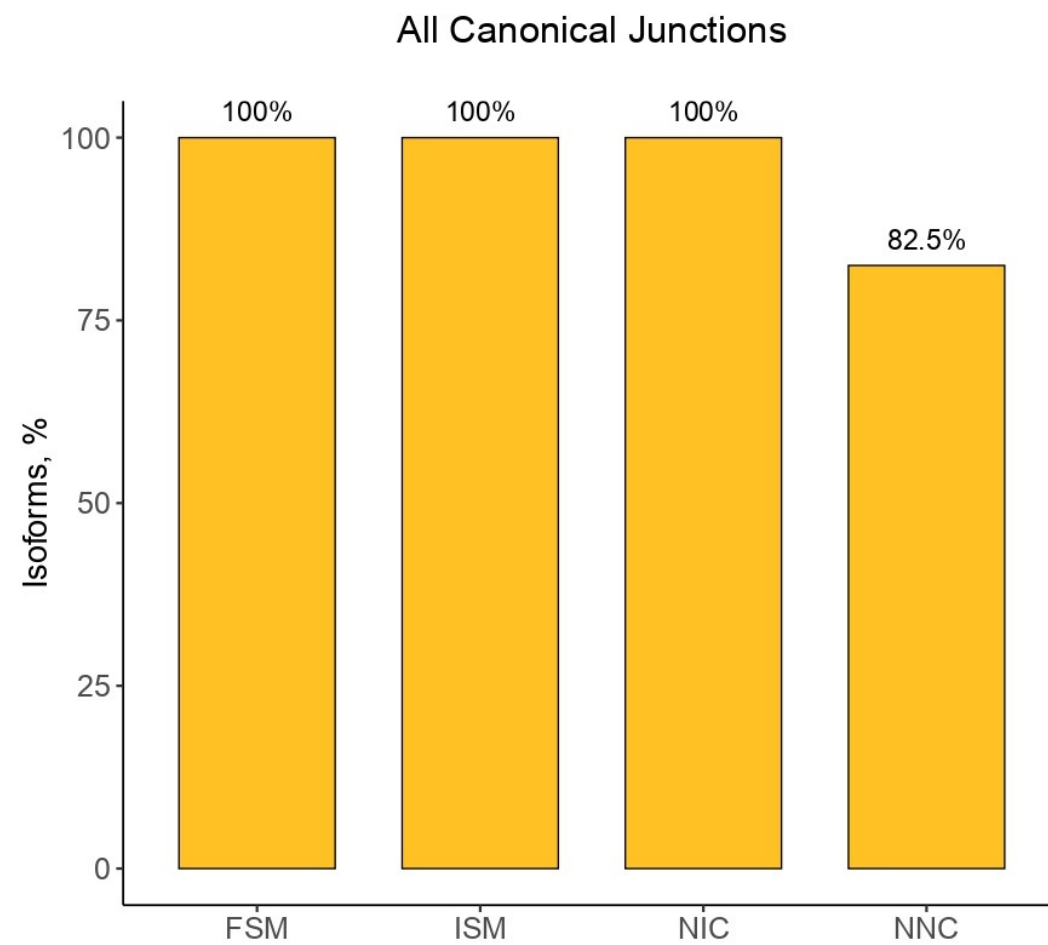

**Supplementary Figure 11.** Percentage of isoforms among major isoform categories with canonical splice junctions.

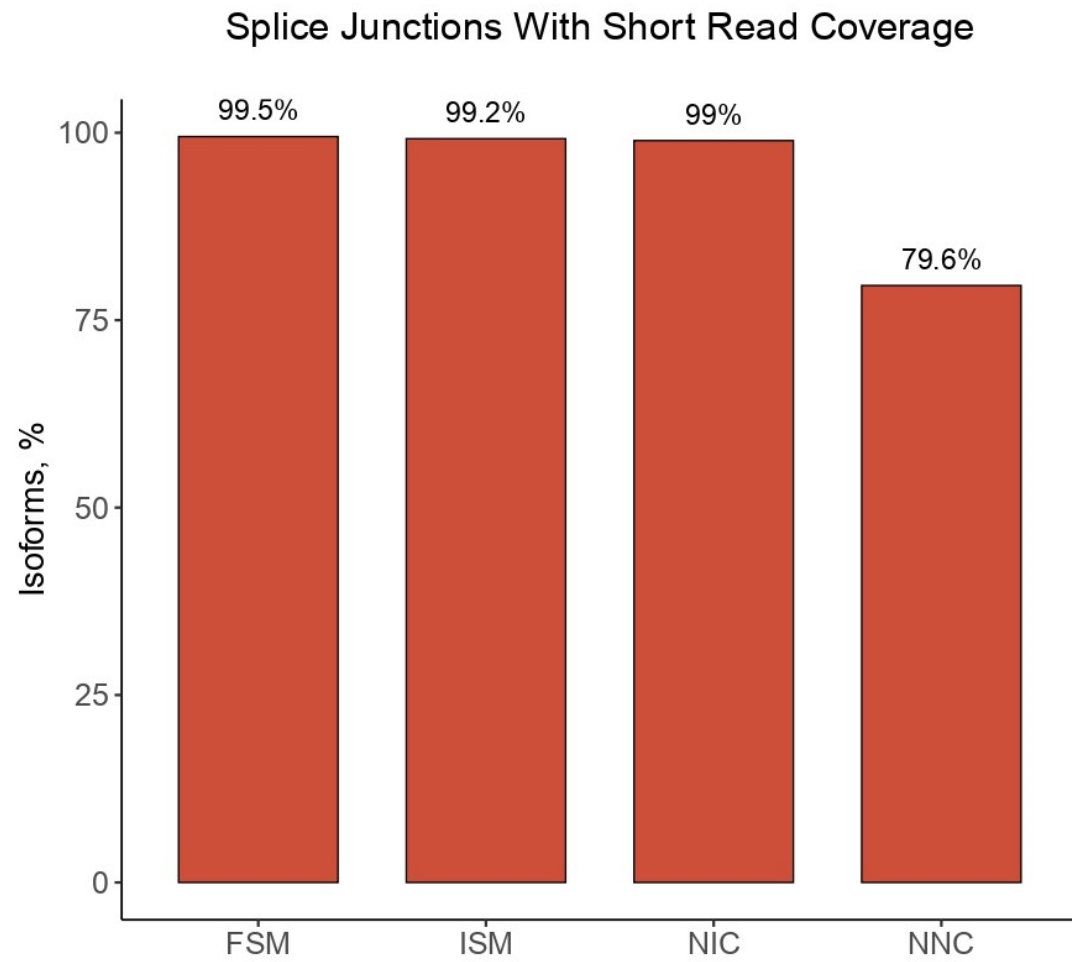

**Supplementary Figure 12.** Percentage of isoforms among major isoform categories where the splice junctions could be verified with RNAseq reads.

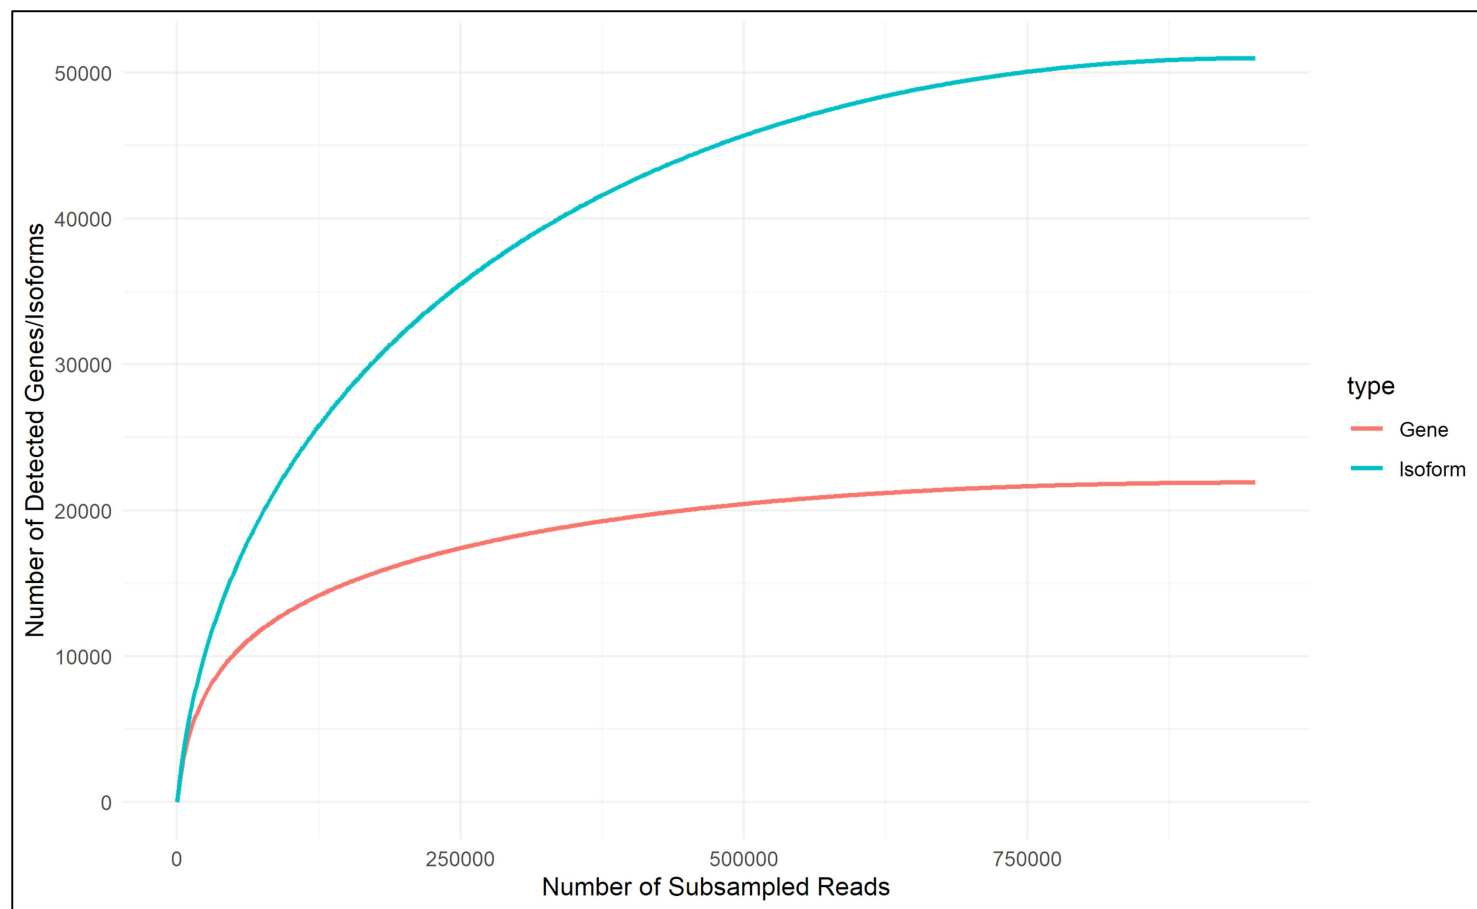

**Supplementary Figure 13.** Rarefaction curve depicting the sequencing depth required for discovery of genes and isoforms.

**Supplementary Table 1.** Splice Junction Classification for the transcripts of *M. cephalus*.

| Category            | Splice Junction count | Percent |
|---------------------|-----------------------|---------|
| Known canonical     | 134052                | 70.82   |
| Known Non-canonical | 110                   | 0.06    |
| Novel canonical     | 49152                 | 25.97   |
| Novel Non-canonical | 5978                  | 3.16    |
